# Supplementary material for: Binuclear cyclometalated Ir(iii) complexes with bis-bidentate butterfly-shaped ligands: synthesis, characterization, and application in efficient yellow–orange light-emitting electrochemical cells
Source: Royal Society of Chemistry journal article supplement (doi:10.1039/d4dt01958j), 2024-01-01
Supplement: d4dt01958j1.pdf [file d4dt01958j1.pdf]

supplementary Information for:

## Binuclear Cyclometalated Ir(III) Complexes With Bis-Bidentate Butterfly Shaped Ligands: Synthesis, Characterizations, and Application to Efficient Yellow-Orange Light-Emitting Electrochemical Cells

Milad Mazaheri,<sup>a</sup> Babak Nemati Bideh,<sup>\*a</sup> Ahmad Sousaraei<sup>b</sup>

<sup>a</sup> Inorganic Chemistry Department, Faculty of Chemistry and Petroleum Sciences, Bu-Ali Sina University, Hamedan, Iran.

<sup>b</sup> Departamento de Química Inorgánica, Facultad de Ciencias, Universidad Autónoma de Madrid, 28049, Madrid, Spain

## 1. Materials and Methods

All reagents and solvents were purchased from commercial sources and used without further purification. NMR spectra were recorded on a Bruker 400 MHz spectrometer with D<sub>6</sub>-DMSO as solvent. Elemental analysis was undertaken using an Elementar Vario EL CHN elemental analyzer. TOF-Mass was performed on LC-MS/MS Quattro Micro API micromass Waters 2695. FT-IR spectroscopy was performed on solid samples using a Perkin-Elmer 597 spectrometer. The electrochemical study of iridium complexes, IrL1, IrL2, (2×10<sup>-3</sup> M) was conducted on a SAMA500 potentiostat electrochemical analyzer with a standard three-electrode system, a platinum disk working electrode, a platinum wire counter electrode, and Ag/AgCl as the reference electrode, and 0.1 M NBu<sub>4</sub>PF<sub>6</sub> in dry CH<sub>3</sub>CN was used as the supporting electrolyte. In CV the following parameters and equations were used: scan rate, 80 mV s<sup>-1</sup>; formal potential  $E^{\circ} = (E_{pa} + E_{pc})/2$  where  $E_{pa}$  and  $E_{pc}$  are anodic and cathodic peak potentials, respectively;  $\Delta E_p$  is the peak-to-peak separation. The oxidation ( $E_{ox}$ ) was used to calculate the HOMO/LUMO energy levels and electrochemical energy gap energy ( $E_{gap\ Elc}$ ) using the equations  $E_{HOMO} = - (4.8 + E_{ox})$  eV,  $E_{g\ Elc} = [E_{1/2\ ox} - E_{1/2\ red}]$  V and  $E_{LUMO} = - (4.8 + E_{red})$  eV which is the half-wave oxidation potential of ferrocene was found to be 0.43 V [1]. The optical energy gap ( $E_{g\ Opt}$ ) was calculated from the intersection of absorption and emission spectra in acetonitrile solution. UV-visible absorption measurements were recorded with an Analytik Jena spectrophotometer in acetonitrile solutions at 298 K. Photoluminescence (PL) emission spectra were recorded in degassed solutions at 298 K using Cury Eclipse Elo fluorometer spectrophotometer. The PL spectra and PLQYs in neat films were measured with an absolute PLQY measurement system (Hamamatsu C11347) equipped with an integrating sphere. Solution photoluminescent quantum yields were calculated by a relative method utilizing [Ru(bpy)<sub>3</sub>]<sup>2+</sup> in CH<sub>3</sub>CN solution at room temperature as a standard ( $\Phi_{std} = 0.095$ ) [2] using the following equation:

$$\Phi_{unk} = \Phi_{std} \cdot \left( \frac{I_{unk}/A_{unk}}{A_{std}/I_{std}} \right) \cdot \left( \frac{\eta_{unk}}{\eta_{std}} \right)^2$$

In equation,  $\Phi_{unk}$  is PL quantum yield of binuclear iridium complexes (IrL1 and IrL2),  $I_{unk}$  and  $I_{std}$  are the integrated areas of the PL spectra of the iridium complexes and standard respectively,  $A_{unk}$  and  $A_{std}$  are the absorbances of the iridium complexes and the standard at the excitation wavelength ( $\lambda_{exc} = 350$  nm), and  $\eta_{unk}$  and  $\eta_{std}$  are the indexes of refraction of the respective solvents (taken to be equal to the neat solvents in both cases). Thin films of complexes (thickness of about 200 nm) to calculate the PLQY of film emission were obtained by spin-coating an acetonitrile solution of iridium complexes: IL ([BMIM<sup>+</sup>(PF<sub>6</sub>)<sup>-</sup>]) with a ratio of 4:1 on a glass substrate at 1000 rpm for 20 s. After evaporation of the solvent, the neat films were dried overnight under a vacuum at room temperature.

**LEC fabrication and characterization:** Indium tin oxide (ITO) coated glass with a sheet resistance of 15  $\Omega$ /square and size of 1.5 × 2.0 cm was used as the transparent anode. The substrates were cleaned with isopropanol, acetone, and deionized water for 15 min in an ultrasonication bath and then dried at 100 °C for 2h. Thin films (ca. 30 nm) of poly(3,4 ethylenedioxythiophene):poly(styrene sulfonate) (PEDOT:PSS) were spin-coated onto ITO/glass substrates at 2000 rpm for 100 s and then annealed at 180 °C for 30 min in a nitrogen filled ambient. The active layer (150 nm) (IrL1 or IrL2:IL, 4:1, IL: 1-butyl-3-methylimidazolium hexafluorophosphate [BMIM<sup>+</sup>(PF<sub>6</sub>)<sup>-</sup>]) for each LEC device was spin-coated from a 5% (w/v) acetonitrile solution at 2500 rpm for 60 s under ambient conditions. After spin coating, the devices were transferred to an inert atmosphere glove box (<0.1 ppm O<sub>2</sub> and H<sub>2</sub>O) and heated at 60 °C for 12 h. Then, the Ag electrode (70 nm) was deposited by thermal evaporation and encapsulated into the glove box. The emissive area of the devices was 0.25 cm<sup>2</sup>. The current density, luminescence versus the voltage and emission characteristics of LEC devices were measured using USB2000 fiber optic spectrometer, a

SAMA500 electroanalyser system, and a True Color Sensor MAZeT (MTCSiCT Sensor) with a Botest OLT OLED Lifetime-Test System.

## 2. Synthesis and characterization

### 2.1. Synthesis of precursor materials and bis-bidentate ligands:

1,10-phenanthroline-5,6-dione (phendione) and dimmer precursor complex of  $[\text{Ir}(\text{ppy})_2\text{Cl}]_2$  were synthesized according to the literature reports [3, 4]. The bis(4-(2-(p-tolyl)-1H-imidazo[4,5-f][1,10]phenanthroline-1-yl)phenyl)methane (L1) and bis(4-(2-(pyridine-3-yl)-1H-imidazo[4,5-f][1,10]phenanthroline-1-yl)phenyl)methane (L2) ligands were synthesized, characterized, and approved according to our previous works [5, 6]. The mononuclear complex (Ir3) corresponding to IrL2 was synthesized according to the literature [7].

### 2.2. General procedure for synthesis of binuclear complexes, IrL1 and IrL2, $[(\text{Ir}(\text{ppy})_2)_2(\text{L1, 2})](\text{ClO}_4)_2$ :

A mixture of 0.019 mmol of  $[\text{Ir}(\text{ppy})_2\text{Cl}]_2$ , 0.019 mmol of bis-bidentate ligands (L1 and L2) and 5 ml ethylene glycol was degassed by  $\text{N}_2$  for 30 min and heated under  $\text{N}_2$  atmosphere at  $150^\circ\text{C}$  for 18.0 h to give a clear yellow-orange solution. The mixture was cooled to room temperature and then, a saturated aqueous solution of  $\text{NaClO}_4$  was added drop by drop to it until gave a pale orange-yellow precipitate and then washed several times with distilled water to remove traces of salts. The product was purified by column chromatography on silica with acetonitrile as an eluent. After the mainly yellow-orange band was collected, the solvent was removed by rotary evaporation and the solid were obtained and dried under vacuum.

CAUTION: Perchlorate salts of metal complexes with organic ligands are potentially explosive, and only small amounts of the material should be prepared and handled with great care!

**$[(\text{Ir}(\text{ppy})_2)_2(\text{L1})](\text{ClO}_4)_2 \cdot 2(\text{H}_2\text{O})$  (IrL1).** Yield: 62%. IR (KBr):  $\tilde{\nu} = 3035$  (C-H aromatic), 2924 (C-H aliphatic), 1606 (C=C), 1092 (Cl-O)  $\text{cm}^{-1}$ .  $^1\text{H}$ NMR (400 MHz, D6-DMSO): 9.32 (d, 2H), 8.22-8.36 (m, 6H), 8.17 (m, 2H), 8.05 (d, 2H), 7.86-8.03 (m, 8H), 7.73-7.86 (m, 4H), 7.68 (d, 2H), 7.57-7.67 (m, 4H), 7.41-7.55 (m, 10H), 6.85-7.22 (m, 16H), 6.17-6.42 (dd, 4H), 4.41 (s, 2H,  $\text{CH}_2$  spacer), 2.10 (s, 6H, Hydrogens of methyl groups on C2 imidazole moiety).  $^{13}\text{C}$  NMR (101 MHz, DMSO)  $\delta$  167.36, 165.67, 154.37, 151.01, 150.54, 149.78, 149.55, 148.66, 144.99, 144.65, 144.43, 140.25, 139.24, 136.58, 135.39, 132.92, 131.65, 130.77, 129.98, 129.54, 129.46, 128.22, 127.35, 126.71, 126.48, 125.58, 124.41, 124.24, 122.88, 122.47, 120.49, 21.18 (Carbon of methyl groups). Anal. calcd. For  $\text{C}_{97}\text{H}_{72}\text{Cl}_2\text{Ir}_2\text{N}_{12}\text{O}_{10}$  (%): C, 57.65; H, 3.59; N, 8.32. Found (%): C, 57.69; H, 3.61; N, 8.33. MS (m/z): 895 ( $[\text{IrL1}-2\text{ClO}_4]^{+2}$ ).

**$[(\text{Ir}(\text{ppy})_2)_2(\text{L2})](\text{ClO}_4)_2 \cdot 3(\text{H}_2\text{O})$  (IrL2).** Yield: 61%. IR (KBr):  $\tilde{\nu} = 3040$  (C-H aromatic), 2920 (C-H aliphatic), 1639 (C=N), 1604 (C=C), 1093 (Cl-O)  $\text{cm}^{-1}$ .  $^1\text{H}$ NMR (400 MHz, D6-DMSO): 9.35 (d, 2H), 8.80 (s, 2H), 8.55 (d, 2H), 8.23-8.35 (m, 6H), 8.16-8.22 (m, 2H), 8.09 (d, 2H), 7.86-8.02 (m, 10H), 7.84 (d, 4H), 7.73 (m, 2H), 7.65 (t, 4H), 7.45-7.59 (m, 6H), 7.42 (m, 2H), 6.89-7.13 (m, 12H), 6.29 (dd, 4H), 4.40 (s, 2H,  $\text{CH}_2$  spacer).  $^{13}\text{C}$  NMR (101 MHz, DMSO)  $\delta$  166.83, 151.42, 150.52, 150.42, 149.98, 149.37, 149.05, 148.51, 144.74, 144.28, 144.05, 143.94, 138.76, 136.57, 136.20, 134.34, 132.46, 131.16, 130.28, 129.67, 128.98, 128.01, 127.92, 126.51, 125.97, 125.41, 125.09, 123.88, 123.75, 123.46, 122.39, 121.93, 119.99, 114.20, 113.10, 110.82, 107.95. Anal. calcd. For  $\text{C}_{93}\text{H}_{68}\text{Cl}_2\text{Ir}_2\text{N}_{14}\text{O}_{11}$  (%): C, 55.49; H, 3.41; N, 9.74. Found (%): C, 55.53; H, 3.43; N, 9.76. MS (m/z): 882 ( $[\text{IrL1}-2\text{ClO}_4]^{+2}$ ).

### 3. FT-IR Spectra

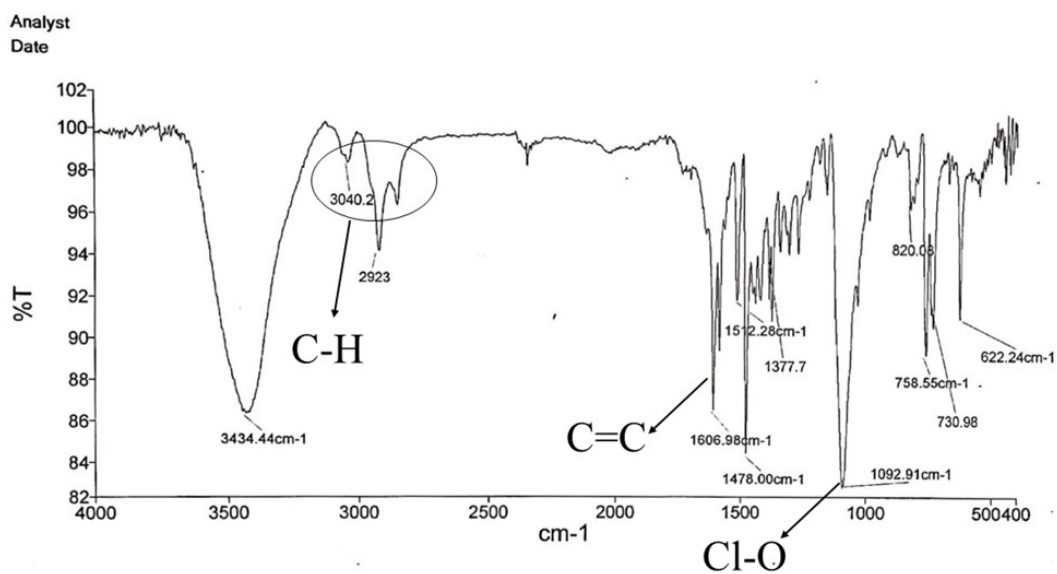

Figure S1. FT-IR spectrum of IrL1 complex in KBr

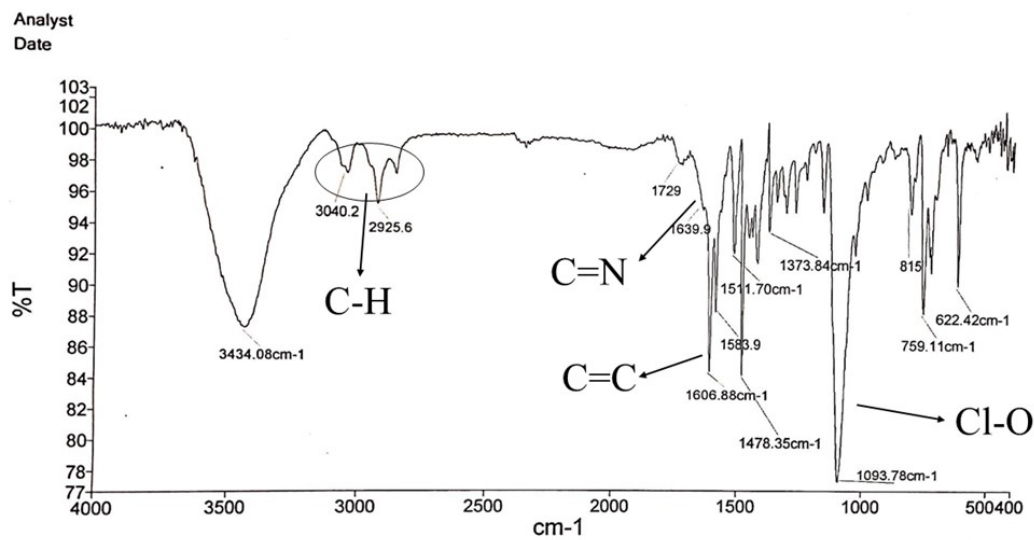

Figure S2. FT-IR spectrum of IrL2 complex in KBr

#### 4. NMR spectra

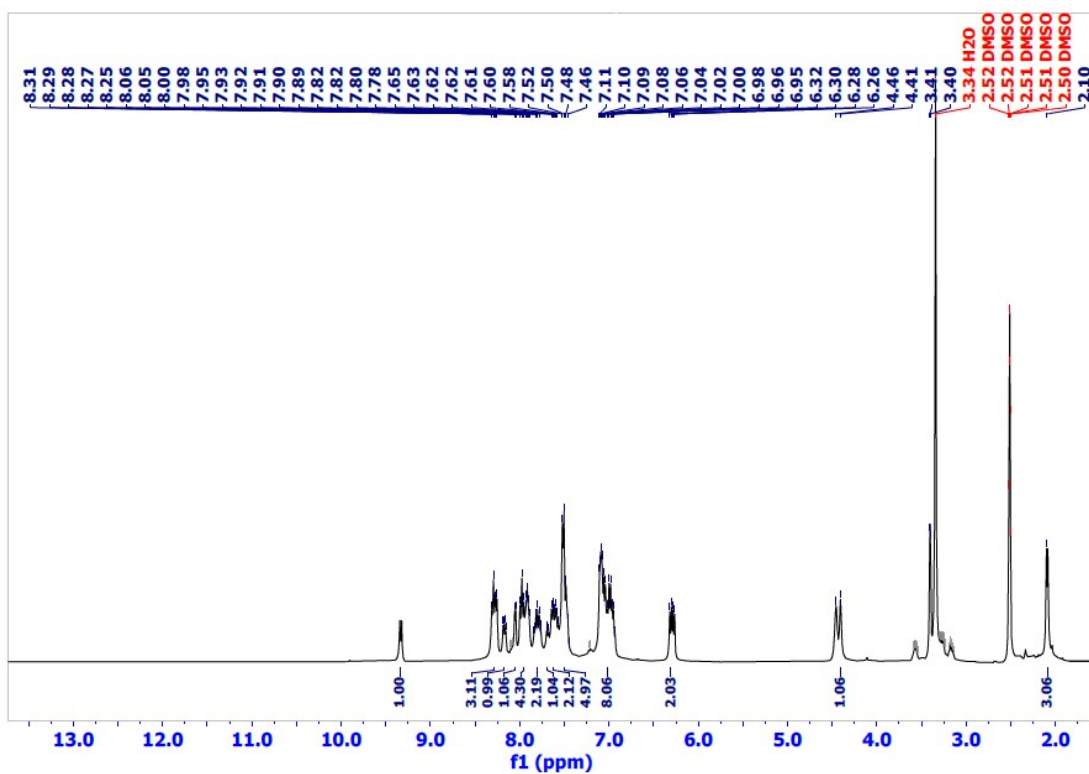

Figure S3. <sup>1</sup>H NMR of IrL1 in D<sub>6</sub>-DMSO

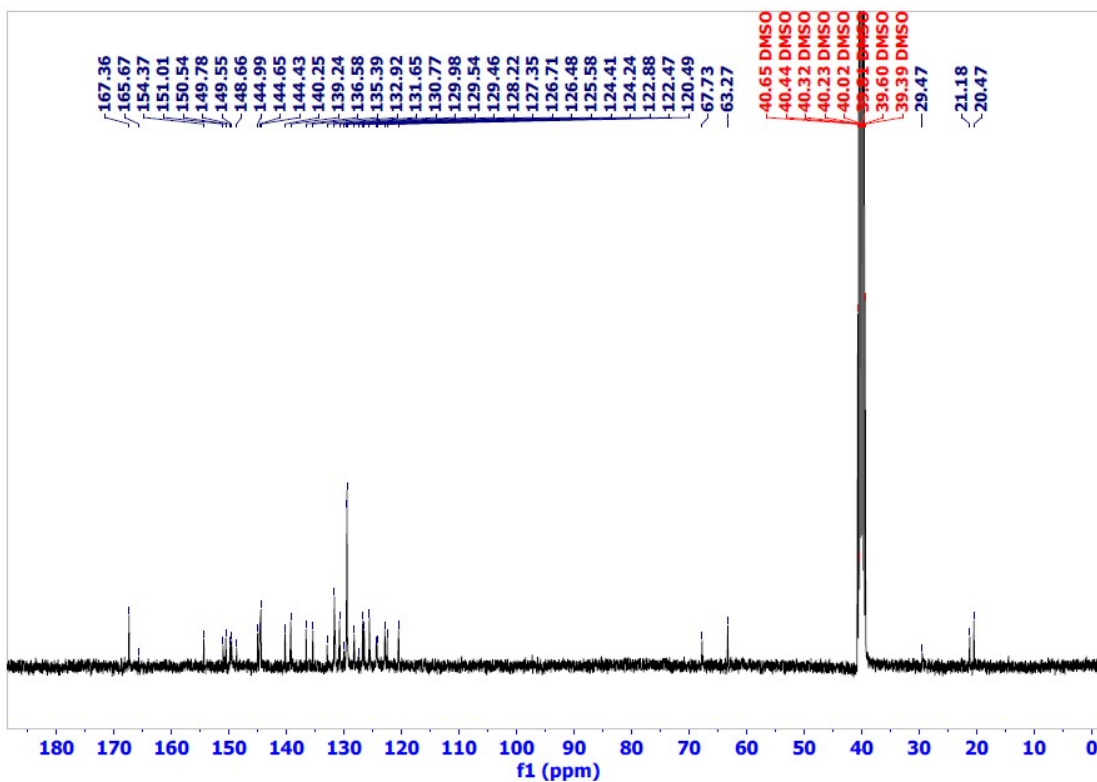

Figure S4. <sup>13</sup>C NMR of IrL1 in D<sub>6</sub>-DMSO.

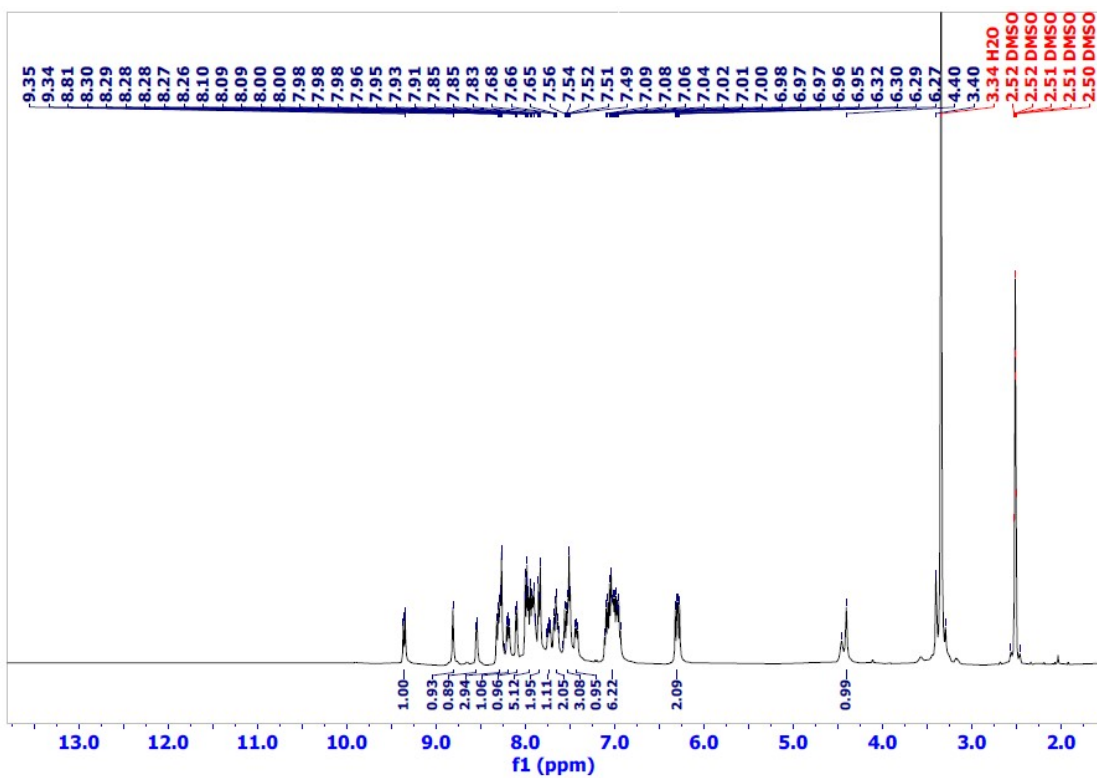

Figure S5. <sup>1</sup>H NMR of IrL2 in D<sub>6</sub>-DMSO

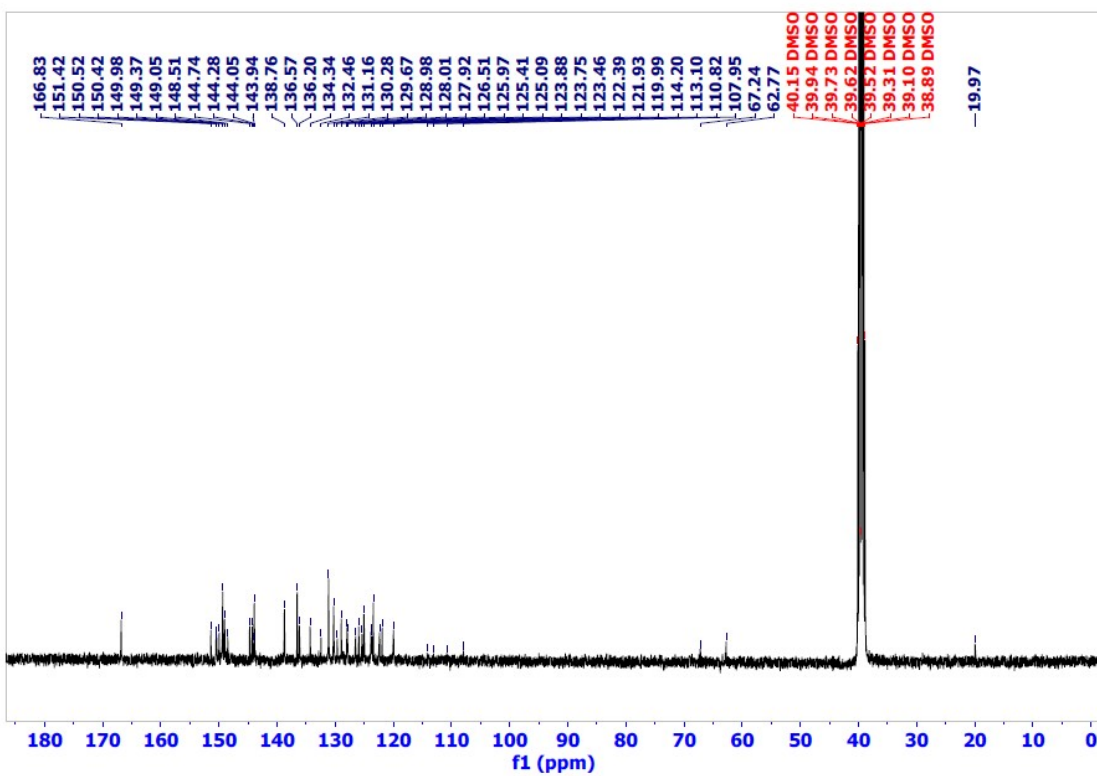

Figure S6. <sup>13</sup>C NMR of IrL2 in D<sub>6</sub>-DMSO

## 5. Mass Spectra

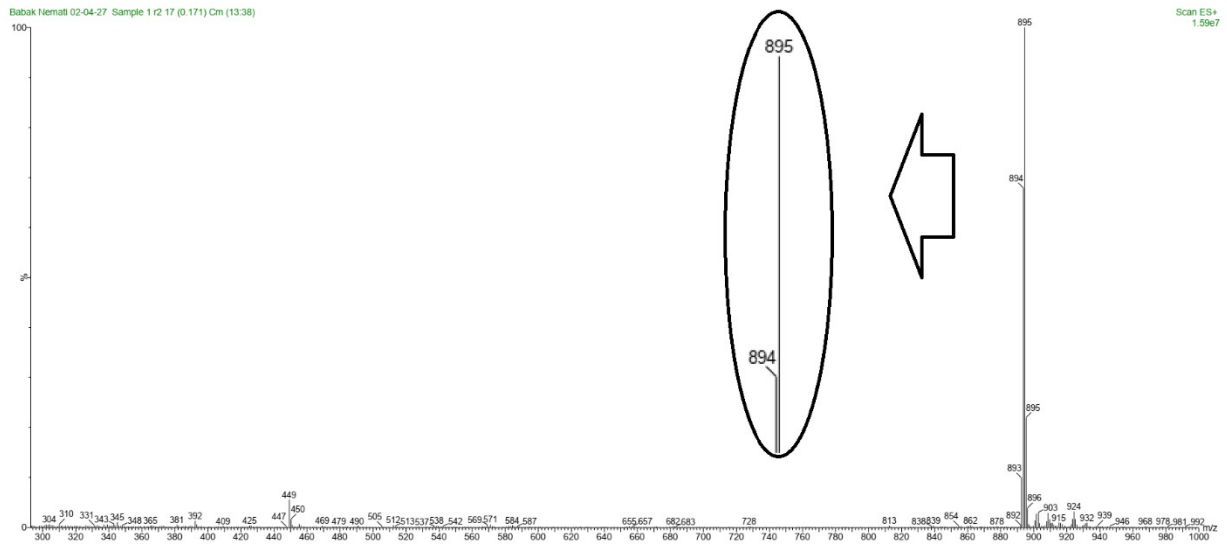

Figure S7. Mass spectrum of Irl1 complex

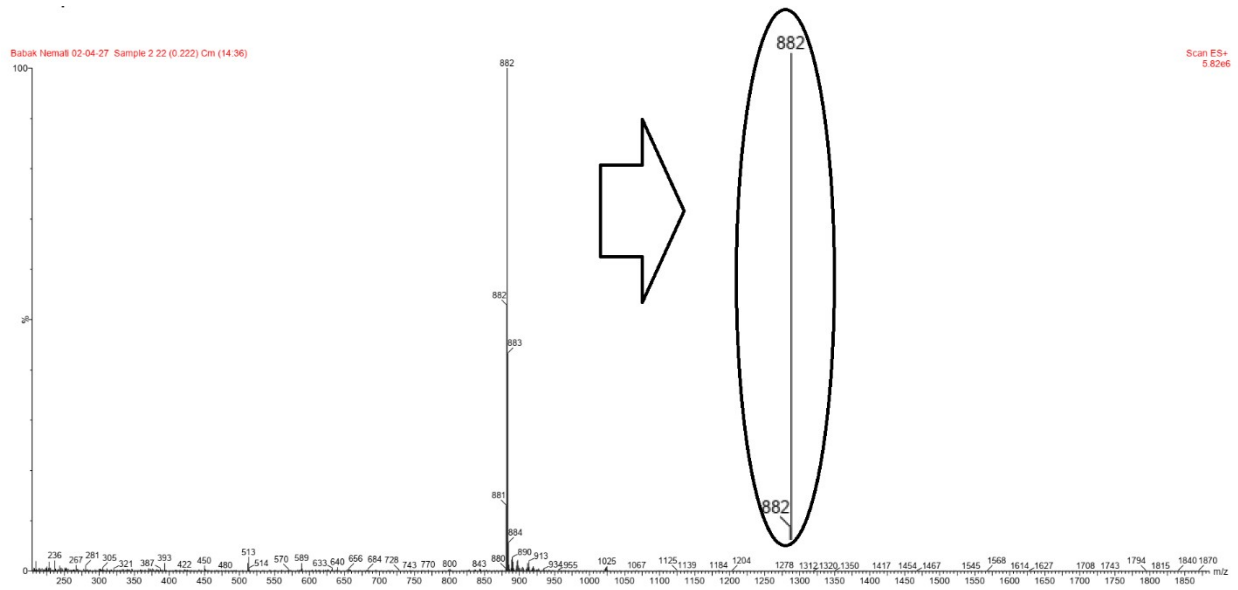

Figure S8. Mass spectrum of Irl2 complex

## 6. Tables

**Table S1.** EL properties of light-emitting electrochemical cell based on binuclear Iridium (III) complexes

| Binuclear Ir(III) emitter structure                                                 | PLQY (%) | Cell configuration                                    | $\lambda_{\text{max}}^{\text{EL}}$ (nm) | $L_{\text{max}}$ (cd.m <sup>-2</sup> ) | Efficacy (cd.A <sup>-1</sup> ) | Ref. |
|-------------------------------------------------------------------------------------|----------|-------------------------------------------------------|-----------------------------------------|----------------------------------------|--------------------------------|------|
| 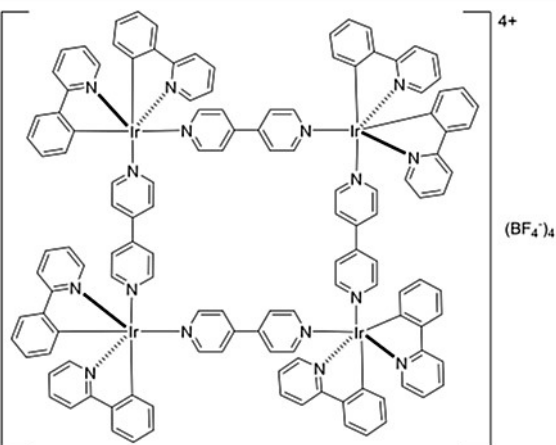   | 18       | ITO/ PEDOT:PSS/ Ir-ITMC/ Ag                           | 684                                     | 41.3<br>(about 6 V)                    | -                              | 8    |
|   | 29       | ITO/ PEDOT:PSS/ Ir-ITMC/ Ag                           | 692                                     | 1.8<br>(about 4 V)                     | -                              | 8    |
|  | 74       | ITO/ PEDOT:PSS/ Ir-ITMC/ Ag                           | 560                                     | 123.3<br>(about 6 V)                   | -                              | 8    |
|  | 72.1     | ITO/PEDOT:PSS/Ir-ITm:BMIM/FP6 (molar ratio 1 : 0.144) | 550                                     | 5996<br>(10 V)                         | 18.7                           | 9    |



|                                                                                     |     |                                                       |     |                        |      |    |
|-------------------------------------------------------------------------------------|-----|-------------------------------------------------------|-----|------------------------|------|----|
| 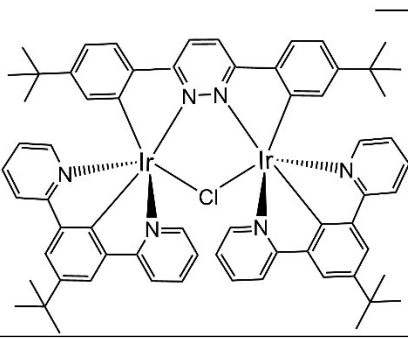   | 33  | ITO/PEDOT:PSS/Ir-ITMC/Al                              | 588 | 124                    | 1.2  | 10 |
|    | 0.9 | ITO/PEDOT:PSS/Ir-Tm:TBuAPF6<br>(molar ratio 1 : 1)/Al | 596 | 10 >                   | -    | 11 |
|   | 0.7 | ITO/PEDOT:PSS/Ir-Tm:TBuAPF6<br>(molar ratio 1 : 1)/Al | 540 | 10 >                   | -    | 11 |
|  | 57  | ITO/PEDOT:PSS/Ir(III)<br>complexes:BMIM/Al            | 518 | 6475<br>(about 12.5 V) | 31.2 | 12 |
|  | 50  | ITO/PEDOT:PSS/Ir(III)<br>complexes:BMIM/Al            | 517 | 3368<br>(about 12.5 V) | 40   | 12 |

|                                                                                   |    |                                      |     |                        |      |    |
|-----------------------------------------------------------------------------------|----|--------------------------------------|-----|------------------------|------|----|
| 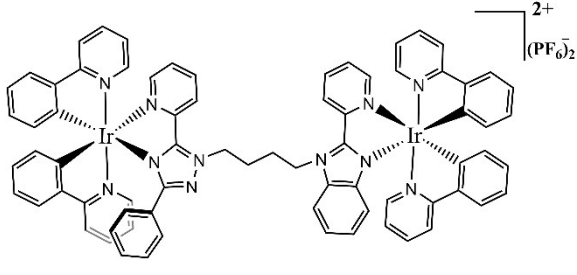 | 31 | ITO/PEDOT:PSS/Ir(III) complexes:BMIM | 580 | 2558<br>(About 12.5 V) | 38.4 | 12 |
|-----------------------------------------------------------------------------------|----|--------------------------------------|-----|------------------------|------|----|

## 7. References

1. X. Meng, M. Chen, R. Bai and L. He, Cationic iridium complexes with 3, 4, 5-triphenyl-4 H-1, 2, 4-triazole type cyclometalating ligands: Synthesis, characterizations, and their use in light-emitting electrochemical cells, *Inorganic Chemistry*, 2020, **59**, 9605-9617.
2. K. Suzuki, A. Kobayashi, S. Kaneko, K. Takehira, T. Yoshihara, H. Ishida, Y. Shiina, S. Oishi and S. Tobita, Reevaluation of absolute luminescence quantum yields of standard solutions using a spectrometer with an integrating sphere and a back-thinned CCD detector, *Physical Chemistry Chemical Physics*, 2009, **11**, 9850-9860.
3. W. Paw and R. Eisenberg, Synthesis, characterization, and spectroscopy of dipyrrocatecholates complexes of platinum, *Inorganic chemistry*, 1997, **36**, 2287-2293.
4. S. Sprouse, K. King, P. Spellane and R. J. Watts, Photophysical effects of metal-carbon. sigma. bonds in ortho-metalated complexes of iridium (III) and rhodium (III), *Journal of the American Chemical Society*, 1984, **106**, 6647-6653.
5. B. N. Bideh and H. Shahroosvand, Efficient near infrared light emitting electrochemical cell (NIR-LEEC) based on new binuclear ruthenium phenanthroimidazole exhibiting desired charge carrier dynamics, *Scientific Reports*, 2017, **7**, 15739.
6. B. N. Bideh and H. Shahroosvand, New molecularly engineered binuclear ruthenium (ii) complexes for highly efficient near-infrared light-emitting electrochemical cells (NIR-LECs), *Dalton Transactions*, 2022, **51**, 3652-3660.
7. B. N. Bideh, M. Moghadam, A. Sousaraei, B. Shahpoori Arani, Phenanthroimidazole as molecularly engineered switch for efficient and highly long-lived light-emitting electrochemical cell. *Scientific Reports*, 2023, **13**, 2287.
8. L. C. Shiu, B. R. Chang, M. C. S. Hsiao, W. S. Sie, M. L. Wu, L. X. Huang, C. M. Wang, G. H. Lee, I. J. Chang and H. C. Su, Alkyl-Spacer Enhancement in Performance of Light-Emitting Electrochemical Cells, *European Journal of Inorganic Chemistry*, 2020, **2020**, 3517-3526.
9. W. Song, H. Mao, K. Shao, G. Shan, Y. Gao, Q. Zeng, F. Li and Z. Su, Dinuclearization strategy of cationic iridium (iii) complexes for efficient and stable flexible light-emitting electrochemical cells, *Journal of Materials Chemistry C*, 2023, **11**, 1197-1204.
10. M.-G. La-Placa, A. M. Igual-Muñoz, J. Romero, R. E. Daniels, V. N. Kozhevnikov, M. Sessolo and H. J. Bolink, Red Light-Emitting Electrochemical Cells Employing Pyridazine-Bridged Cationic Diiridium Complexes, *ECS Journal of Solid State Science and Technology*, 2019, **8**, R84.
11. R. D. Costa, G. Fernández, L. Sánchez, N. Martín, E. Ortí and H. J. Bolink, Dumbbell-Shaped Dinuclear Iridium Complexes and Their Application to Light-Emitting Electrochemical Cells, *Chemistry—A European Journal*, 2010, **16**, 9855-9863.
12. H.-T. Mao, Y. Cui, G.-F. Li, G.-G. Shan, Q.-Y. Zeng, F.-S. Li and Z.-M. Su, Dinuclear Ir (iii) complexes with asymmetrical bridging ligands as highly efficient phosphors for single-layer electroluminescent devices, *Journal/Journal of Materials Chemistry C*, 2019, **7**, 13461-13467.
